# Supplementary material
Source: Springer Nature journal article supplement (https://www.springermedizin.de/resource/supplementary/13063_2012_1415_MOESM1_ESM.pdf/9619986)
Supplement: MOESM1 [file 9619986]

104 practices working across **138 surgeries (sites)**

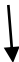

**Consent to participate**

**Yes**

**No**

54 practices (**66 surgeries**)

50 practices (**72 surgeries**)

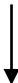

**Randomisation**

Low intensity group

High intensity group

28 practices (**34 surgeries**)

26 practices (**32 surgeries**)
